# Supplementary material for: Trastuzumab Modulates the Protein Cargo of Extracellular Vesicles Released by ERBB2+ Breast Cancer Cells
Source: MDPI journal article supplement (doi:10.3390/membranes11030199), 2021-03-12
Supplement: s1 [file s1]

# Supplementary Material: Trastuzumab Modulates the Protein Cargo of Extracellular Vesicles Released by ERBB2<sup>+</sup> Breast Cancer Cells

Silvia Marconi, Sara Santamaria, Martina Bartolucci, Sara Stigliani, Cinzia Aiello, Maria Cristina Gagliani, Grazia Bellese, Andrea Petretto, Katia Cortese and Patrizio Castagnola

**Table S1.** Antibodies used in the study.

| Antibody         | Catalog number | Manufacturer                         |
|------------------|----------------|--------------------------------------|
| Anti-ALIX        | sc-271975      | Santa Cruz <sup>1</sup>              |
| Anti-CD9         | PA5-85955      | Thermofisher Scientific <sup>2</sup> |
| Anti-CD63        | sc-15363       | Santa Cruz                           |
| Anti-ErbB2 (9G6) | sc-08          | Santa Cruz                           |
| Anti-GAPDH       | 14C10          | Cell signaling <sup>3</sup>          |
| Anti-HSP90       | sc-13119       | Santa Cruz                           |

<sup>1</sup> Dallas, TX, USA; <sup>2</sup> Waltham, MA, USA; <sup>3</sup> Danvers, MA, USA.

**Table S2.** Differentially regulated proteins by trastuzumab Tz treatment in extracellular vesicles EVs purified from SKBR-3 cells with a statistically significant p-value resulted from Student's T-test. The gene symbols coding for proteins downregulated by Tz (and hence upregulated in IgG treated cells) are highlighted in red while proteins upregulated by Tz are highlighted in blue.

| Official Gene Symbol <sup>1</sup> | Gene product (Protein name)                                  |
|-----------------------------------|--------------------------------------------------------------|
| ACVR1B                            | Activin A receptor type 1B                                   |
| ANO1                              | Anoctamin 1                                                  |
| ARFGEF2                           | ADP Ribosylation Factor Guanine Nucleotide Exchange Factor 2 |
| BTN2A1                            | Butyrophilin subfamily 2 member A1                           |
| CIAPIN1                           | Cytokine Induced Apoptosis Inhibitor 1                       |
| CIT                               | Citron Rho-Interacting Serine/Threonine Kinase               |
| CPPED1                            | Calcineurin Like Phosphoesterase Domain Containing 1         |
| DNAH7                             | Dynein Axonemal Heavy Chain 7                                |
| EIF3F                             | Eukaryotic translation initiation factor 3 subunit F         |
| ESD                               | Esterase D                                                   |
| ESYT2                             | Extended Synaptotagmin 2                                     |
| F2RL1                             | F2R Like Trypsin Receptor 1                                  |
| RIPOR3                            | RIPOR Family Member 3                                        |
| FZD6                              | Frizzled-6                                                   |
| GAN                               | Gigaxonin                                                    |
| GTPBP2                            | GTP-binding protein 2                                        |
| GUCD1                             | Guanylyl Cyclase Domain Containing 1                         |
| HNRNPM                            | Heterogeneous nuclear ribonucleoprotein M                    |
| LMAN2                             | Lectin, Mannose Binding 2                                    |
| LRRC8A                            | Volume-regulated anion channel subunit LRRC8A                |
| NOTCH4                            | Notch Receptor 4                                             |
| NT5C2                             | 5'-Nucleotidase, Cytosolic II                                |
| PCID2                             | PCI domain-containing 2                                      |
| PDCD5                             | Programmed cell death 5                                      |
| PHLDB3                            | Pleckstrin homology like domain family B member 3            |
| PLAA                              | Phospholipase A2 activating protein                          |

|         |                                                                                  |
|---------|----------------------------------------------------------------------------------|
| PLPP3   | Phospholipid Phosphatase 3                                                       |
| PPP2R5E | Protein Phosphatase 2 Regulatory Subunit B'Epsilon                               |
| RALGPS1 | Ral GEF With PH Domain And SH3 Binding Motif 1                                   |
| RBBP7   | RB Binding Protein 7, Chromatin Remodeling Factor                                |
| RFC4    | Replication factor C subunit 4                                                   |
| RPL13A  | Ribosomal protein L13a                                                           |
| RPL8    | Ribosomal protein L8                                                             |
| RRM2    | Ribonucleotide Reductase Regulatory Subunit M2                                   |
| RUVBL2  | RuvB Like AAA ATPase 2                                                           |
| SCIN    | Scinderin                                                                        |
| SHTN1   | Shootin 1                                                                        |
| SLC35F6 | Solute carrier family 35 member F6                                               |
| SMCHD1  | Structural maintenance of chromosomes flexible hinge domain containing protein 1 |
| SPAST   | Spastin                                                                          |
| SPTBN1  | Spectrin beta, Non-erythrocytic 1                                                |
| SPTBN2  | Spectrin beta, Non-erythrocytic 2                                                |
| SRSF7   | Serine And Arginine Rich Splicing Factor 7                                       |
| TBCD    | Tubulin Folding Cofactor D                                                       |
| TCF3    | Transcription factor 3                                                           |
| TOP1    | DNA Topoisomerase 1                                                              |
| TWF2    | Twinfilin Actin Binding Protein 2                                                |
| UBTD1   | Ubiquitin domain-containing 1                                                    |
| WASHC5  | WASH Complex Subunit 5                                                           |
| ZNF544  | Zinc finger protein 544                                                          |
| ZYX     | Zyxin                                                                            |

<sup>1</sup> <https://www.genenames.org> (accessed on 11 March 2021).
